# Supplementary material
Source: publisher site journal article supplement (https://www.degruyterbrill.com/publication/isbn/9783839437360/downloadAsset/9783839437360_Leseprobe.pdf)
Supplement: Supplementary file 1 [file 9783839437360_Leseprobe.pdf]

Ursula Gross-Dinter, Florian Feuser,  
Carmen Ramos Méndez-Sahlander (Hg.)

# ZUM UMGANG MIT MIGRATION

Zwischen Empörungsmodus  
und Lösungsorientierung

[transcript] Edition Kulturwissenschaft

**Aus:**

*Ursula Gross-Dinter, Florian Feuser,  
Carmen Ramos Méndez-Sahlander (Hg.)*

## **Zum Umgang mit Migration**

### **Zwischen Empörungsmodus und Lösungsorientierung**

November 2017, 318 Seiten, kart., zahlr. Abb., 32,99 €, ISBN 978-3-8376-3736-6

Worüber sprechen wir, wenn wir von Migration sprechen? Der überhitzten Debatte über Migrantenströme fehlt inzwischen die notwendige Gelassenheit, um aus dem Empörungsmodus herauszutreten. Das ist aber notwendig, um zukunftsfähige Lösungen für die Praxis zu erarbeiten. Gelungene Kommunikation als Vorbedingung nimmt dabei eine zentrale Position ein. Dieser Band setzt deshalb den Fokus auf unterschiedliche Aspekte des Faktums Migration, um sowohl den Status quo als auch die Bedingungen für erfolgversprechende Wege in die Zukunft auszuloten – sowohl in der theoretischen Reflexion als auch in der praktischen Anwendung.

**Ursula Gross-Dinter** ist Konferenzdolmetscherin und Professorin für Dolmetschen und Übersetzen an der Hochschule für Angewandte Sprachen des SDI München.

**Florian Feuser** hat die Professur für interkulturelle Kommunikation inne und ist Vizepräsident der Hochschule für Angewandte Sprachen des SDI München.

**Carmen Ramos Méndez-Sahlander** promovierte in Erziehungswissenschaften und hat die Professur für Spanisch an der Hochschule für Angewandte Sprachen des SDI München inne.

Weitere Informationen und Bestellung unter:

[www.transcript-verlag.de/978-3-8376-3736-6](http://www.transcript-verlag.de/978-3-8376-3736-6)

# Inhalt

---

## **Einleitung**

Florian Feuser | 7

## **Die weltoffene Stadt**

Migration und Vielfalt als urbane Ressource

Erol Yildiz | 11

## **Kompetenzen von Asylsuchenden und Flüchtlingen: Erfassung und Entwicklung für die Arbeitsmarktintegration**

Ottmar Döring, Sara Hauck | 25

## **Zur Gegenwart der sprachlich-beruflichen Integration von Flüchtlingen: Chancen und Risiken**

Ibrahim Cindark, David Hünlich | 47

## **Contrastive Pronunciation Training for Arabic learners of German**

Proposing a MOOC to face didactic challenges  
of Second Language Teaching

Anja Penssler-Beyer, Katharina Weber | 69

## **Migration als Katalysator für die Vereinfachung von Kommunikationsprozessen**

Marita Tjarks-Sobhani | 87

## **Informelle Kompetenzen fördern am Beispiel interkultureller Sprachmittlung**

Regina Freudenfeld | 107

## **Ausbildungstrends in der Professionalisierung von LaiendolmetscherInnen**

Elvira Iannone, Katharina Redl | 123

## **Hybrid linguistic and cultural practices as pathways to integration**

How migration challenges traditional concepts of identity –

The case of Hispanics in the USA

Daniela Wawra | 145

### **Eine verpasste Chance?**

Förderung von Herkunftssprachen als  
berufliche Kompetenz an der Hochschule

Carmen Ramos, Joana Romano | 165

### **#CulturaTándem, preparing students for today's multicultural societies**

A virtual exchange between the Regent's University London  
and the University of Applied Languages SDI Munich

Amparo Lallana, Pilar Salamanca | 189

### **Migrant(innen) in der Schweiz:**

#### **Bedrohung, Bereicherung oder bedürftig?**

Ergebnisse einer korpuslinguistischen Diskursanalyse  
politischer Vorstöße im Schweizer Parlament, 1991-2015

Paula Krüger | 207

### **Zwischen Willkommenskultur und Diskriminierung**

Medien auf der Suche nach Wahrhaftigkeit

Anton Sahlender | 231

### **Flüchtlingsdiskurse in der Bilderwelt**

Fotos als erwünschte und unerwünschte Repräsentationen

Christoph Sauer | 261

### **Was denkst du, was ich glaube?**

Entdeckungen im interreligiösen Dialog

Burkhard Hose | 305

### **Autorinnen und Autoren | 313**

# Einleitung

---

FLORIAN FEUSER

Vielfalt, kulturelle und sprachliche Diversität, hybride Formen aller Art und Menschen mit unterschiedlichen Hintergründen gehören mit Selbstverständlichkeit zu unserem Alltag. Unsere Seminare und Vorlesungen werden von zahlreichen jungen Menschen besucht, die sich auf eine berufliche Tätigkeit in einer global vernetzten Welt vorbereiten. Wer sich mit ihren und den Lebensgeschichten ihrer Eltern auseinandersetzt, wird bald feststellen, dass die zentrale Gemeinsamkeit im Unterschiedlichen steckt. Für sie und für uns ist erfolgreiche interkulturelle Kommunikation kein theoretischer Gegenstand, sondern gelebte, alltägliche und notwendige Praxis, die unsere Zukunft sichert.

Dies erklärt teilweise unser Erstaunen und unsere Betroffenheit über die Aggression, die Vehemenz, die sich in unterschiedlichen Formen offener Fremdenfeindlichkeit seit insbesondere dem Jahr 2015 äußern. Es scheinen Ängste vor Verlusten, vor dem Anderen zu sein, die offenbar einer diffusen Unzufriedenheit mit sich selbst und der Welt entspringen und in der aktuellen Entwicklung ein konkretes Ziel und Ventil finden.

Andererseits steht dem die unprätentiöse Hilfsbereitschaft zahlreicher Ehrenamtlicher gegenüber, die sich wie selbstverständlich um Menschen kümmern, die Hilfe benötigen. Es sind 10 Prozent der Bundesbevölkerung, die sich maßgeblich nicht nur für die Anderen, sondern eben auch und insbesondere für die eigene Gesellschaft einsetzen. Diese Hilfsbereitschaft hat damit, so darf durchaus gesagt werden, eine der größten Bürgerbewegungen der Bundesrepublik aktiviert. Ihre Entwicklung lässt sich von einer zunächst spontanen, selbstverständlichen, nicht koordinierten Hilfsbereitschaft nachzeichnen, hin zu einer zunehmend nahezu professionalisierten Form, die letztlich tatkräftig bei der Eingliederung in den Wohn- und Arbeitsmarkt unterstützt und dabei mit staatlichen Stel-

len eng kooperiert.<sup>1</sup> Dabei sind es laut der zweiten EFA-Studie von 2016 unter anderem folgende Beweggründe: Ehrenamtliche möchten »mit Ihrem Einsatz die Gesellschaft zumindest im Kleinen verändern (97 %) und ein Zeichen gegen Rassismus setzen (90 %)«. Bezeichnend scheint, dass die ehrenamtlich tätigen Menschen die Situation insgesamt gelassen einschätzen und nicht der Auffassung sind, »dass Deutschland durch die Ankunft der Flüchtlinge im Herbst 2015 überfordert gewesen sei«.<sup>2</sup>

Diese Gelassenheit möchten wir uns mit diesem Sammelband zu eigen machen. Seinen Ursprung hat er in einer Ringvorlesung, die wir an der *Hochschule für Angewandte Sprachen des SDI München* im Sommersemester 2016 zum Thema »Migration – Bedrohung oder Bereicherung?« durchführen durften. Ausgangspunkt ist die praxisorientierte Perspektive auf einen Gegenstand, der nicht nur in sich selbst vielfältig, facettenreich und komplex ist, sondern der auch eine multiperspektivische, interdisziplinäre Auseinandersetzung geradezu einfordert. In dem Bewusstsein, somit nur einige Aspekte aufgreifen zu können, wollen wir uns auf die Kernbereiche unserer Kompetenz beschränken. Sprache und Kommunikation und der aufmerksame und sorgsame Umgang mit ihnen sind uns deshalb ein besonderes Anliegen.

Wenn in diesem Zusammenhang, so wie EROL YILDIZ in seinem Beitrag feststellt, Mobilität als Charakteristikum der Gegenwart zu verstehen ist, gilt es, das Faktum hybrider Formen nicht nur zu akzeptieren, sondern darüber hinaus sicherzustellen, dass Verständigung, Teilhabe und kommunikativer Austausch eine Bereicherung durch Vielfalt möglich werden lassen. OTTMAR DÖRING und SARA HAUCK knüpfen hier mit einer Analyse an, die die Erfassung von Kompetenzen von Asylsuchenden und Geflüchteten in den Mittelpunkt stellt und auf diesem Fundament konkrete Vorschläge entwickelt, die zu einer beidseitig sinnvollen und schnellen Gestaltung der Rahmenbedingungen beitragen. Qualifikation und Qualifizierung stehen auch bei IBRAHIM CINDARK und DAVID HÜNLICH im Mittelpunkt des Interesses. Anhand einer Studie bieten die Autoren einen ethnografisch fundierten Einblick in die Qualifizierungsmaßnahme *Perspektive für Flüchtlinge*. Sie legen dabei den Fokus auf die strukturellen und inhaltlichen Merkmale der Maßnahme einerseits und die beruflichen und sprachlichen Ausgangspunkte der Teilnehmer andererseits, um hieraus konkrete Verbesserungs-

---

1 Berliner Institut für empirische Integrations- und Migrationsforschung (2016): EFA-Studie 2. Strukturen und Motive der ehrenamtlichen Flüchtlingsarbeit (EFA) in Deutschland. 2. Forschungsbericht. Ergebnisse einer explorativen Umfrage vom November/Dezember 2015.

2 Ebd., Seite 4.

vorschläge für eine erfolgreiche sprachliche und berufliche Integration abzuleiten. ANJA PENBLER-BEYER und KATHARINA WEBER widmen sich ebenfalls der Frage sprachlicher Integration und diskutieren aus linguistischer Perspektive besondere Anforderungen an Lerner mit arabischer Muttersprache und an Lehrende von Deutsch als Fremdsprache. In diesem Zuge geben sie Einblick in ein eigens entwickeltes und praktisch erprobtes didaktisches Szenario, das als wirksame Ergänzung zu Standardformaten zum Einsatz kommen kann. Auch MARITA TJARKS-SOBHANI widmet sich sprachlichen Hürden und Barrieren. Dabei geht es um die Möglichkeiten, die in einer gezielten Vereinfachung von Sprache liegen. Ausgangspunkt bildet das Konzept *Einfache Sprache*, das insbesondere für berufsrelevante Texte Anwendung finden könnte, um so einen schnelleren beruflichen Einstieg zu gewährleisten, so wie es auch weitere sprachliche Kompetenzsteigerung erleichtert. Einen weiteren Vorschlag aus der Praxis entwickelt REGINA FREUDENFELD. Die Basis stellt ein Projekt zu interkultureller Sprachmittlung dar, das sich neben der qualifizierenden Vorbereitung auf ein Hochschulstudium zum Ziel setzt, über interkulturelle Lerninhalte einen Mehrwert an Professionalisierung zu generieren. Perspektivenreich erscheint dabei, neben anderen, insbesondere das berufliche Einsatzfeld als Laiendolmetscher, das ELVIRA IANNONE und KATHARINA REDL für die DACH-Region abstecken. Sie verweisen in diesem Zuge auf die Potenziale, die professionelle Dolmetscher im Rahmen von Integrationsprozessen zu bieten haben, aber auch auf die damit verbundene Notwendigkeit einer professionalisierten Ausbildung im Bereich des Community Interpreting. DANIELA WAWRA spürt in ihrem Beitrag den Zusammenhängen von Migration im Kontext von sprachlicher und kultureller Identität nach. Dass Mehrsprachigkeit bei Personen mit Spanisch als Herkunftssprache auch als Bedrohung wahrgenommen werden kann, ist ein Punkt, der sicherlich nachdenklich machen wird. Herkunftssprachen in Deutschland wenden sich CARMEN RAMOS und JOANA ROMANO zu. Vor dem Hintergrund einer wachsenden Nachfrage nach mehrsprachigem Personal steht Employability als eine der zentralen Aufgaben der Hochschulausbildung im Mittelpunkt ihrer Überlegungen. Dazu entwickeln sie auf Basis einer Pilotstudie praxisnahe Vorschläge zur sinnvollen Nutzung des Potenzials, das Herkunftssprecher bieten. Die Nutzung neuer Möglichkeiten wird auch bei AMPARO LALLANA und PILAR SALAMANCA thematisiert. Digitalisierung ermöglicht eine besondere Form der Mobilität, nämlich virtuelle Mobilität in kulturell und national übergreifenden Lehr- und Lernkontexten, die im Rahmen des Projekts *#CulturaTándem* erfolgreich erprobt wird. Neben umfassenden Kompetenzen erwerben Studierende dabei einen geschärften Blick auf den Umgang mit kultureller Andersheit. Letztere steht bei PAULA KRÜGER im Zentrum. Inwieweit Migration als Bereicherung oder Bedrohung wahrgenom-

men bzw. dargestellt wird, arbeitet sie anhand einer Diskursanalyse des Sprachgebrauchs im Schweizer Parlament heraus. Trotz gleicher Themen werden je nach politischem Lager unterschiedliche Bilder von Migranten in der Schweiz gezeichnet, die sich anhand von jeweils verwendeten Ausdrücken zuordnen lassen. ANTON SAHLENDER, selbst Journalist, wirft einen kritischen Blick auf die Medien und ihre Gestaltung des Flüchtlingsdiskurses in der deutschen Presse. Dabei entwickelt er anhand ausgewählter Beispiele Vorschläge mit Appellcharakter sowohl für Berichterstatter wie auch für Leser. An diese Überlegungen zu einem verantwortungsvollen Journalismus knüpft auch CHRISTOPH SAUER an, der sich im Rahmen seiner Analyse Repräsentationen des Flüchtlingsdiskurses in der Bilderwelt widmet und hieraus ebenfalls ethische Grundsatzfragen und Konsequenzen ableitet. Der Befund, dass Bilder gelungener Inklusion fehlen, ist insofern bemerkenswert, als es zahlreiche Beispiele für gelungene Integration und sogenannte Willkommenskultur gäbe. Ein Beispiel hierfür schildert BURKHARD HOSE schließlich in Form eines Erfahrungsberichts aus seinem Alltag. Es ist die Praxis der Begegnung, die zu neuen Erkenntnissen und damit einem sehr konkreten Mehrwert führt, der sowohl individuell und subjektiv, aber auch, so resümiert Hose, gesellschaftlich von zentraler Bedeutung ist.

Den genannten Autoren möchten wir an dieser Stelle ein weiteres Mal für die Zusammenfassung ihrer Forschungsergebnisse, Praxiserfahrungen und Überlegungen danken. Insbesondere sei an dieser Stelle MARITA TJARKS-SOBHANI genannt, die mit scharfem Blick und bewundernswerter Geduld wesentlich zum Gelingen dieses Bandes beigetragen hat. Auch ANDREW WILLIAMS schulden wir für die Lektorierung unserer englischen Beiträge Dank. Ihnen, den Besuchern unserer Ringvorlesung und unseren Studierenden widmen wir dieses Büchlein.



# Die weltoffene Stadt

## Migration und Vielfalt als urbane Ressource<sup>1</sup>

---

EROL YILDIZ

Im Gegensatz zu einem ethnisch-nationalen Ordnungsdenken geht es hier um eine spezifische Perspektive, aus der das Verhältnis zwischen Stadt, Migration und Diversität neu gedacht wird. »Stadt ist Migration, Stadt ist Vielfalt« sind Grundgedanken, die im vorliegenden Beitrag im Mittelpunkt stehen. In diesem Zusammenhang werden Ideen und Visionen diskutiert, die Migration, Stadt und Urbanität nicht als isolierte Phänomene betrachten, sondern zum Ausgangspunkt des Denkens wählen. Dies erfordert eine neue Art und Weise des Herangehens, eine Art »kontrapunktischer Blick« im Sinne Edward Saids (1994). Das »Gegenlesen« bedeutet hier, den öffentlichen Migrationsdiskurs aus der Perspektive und Erfahrung von Migration neu zu lesen.

## AUSGANG: DIE ÖFFNUNG DER ORTE ZUR WELT

Die Metapher »Öffnung der Orte zur Welt« charakterisiert das Leben in globalisierten Gesellschaften. Menschen werden in ihren Alltagskontexten ständig mit verschiedenen und oft widersprüchlichen Elementen konfrontiert, die in einem weltweiten Kommunikationszusammenhang stehen. Begriffe wie »methodologischer Kosmopolitismus« (Ulrich Beck), »Transnationale Räume« (Ludger Pries), »Transkulturalität als Praxis« (Robert Pütz), »Transnationale Vergesellschaftung« (Steffen Mau), »banaler Kosmopolitismus« (Ulrich Beck) oder »Superdiversität« (Steven Vertovec) signalisieren diesen Wandel. Weltweite Bezüge ge-

---

1 Die Ideen zu diesem Beitrag habe ich in meinem Buch »Die weltoffene Stadt« entwickelt (Yildiz 2013).

hören in jeder Hinsicht zur Normalität, sind täglich gelebte Erfahrungen, ein integraler Bestandteil unsers Lebens.

Durch technologische und elektronische Transport- und Kommunikationsmöglichkeiten sind unsere Erfahrungs- und Vorstellungsräume inzwischen von weltweiter Reichweite. Eine Art *mobiler Sesshaftigkeit* oder *sesshafter Mobilität* scheint das Charakteristikum heutiger Gesellschaften zu sein, setzt Denkbewegungen in Gang und beeinflusst zunehmend unsere biografischen Lebensentwürfe und Wirklichkeitsauffassungen. Das Phänomen migrationsbedingte Mobilität ist ein Beleg dafür, wie neue Verortungspraxen, Lebenskonstruktionen und damit neue Kompetenzen entwickelt werden (können). Durch solche Bewegungen entstehen neue Bindungen und Vernetzungen, die Menschen und Orte miteinander verknüpfen.

Gegenwärtig beobachten wir einen global gesellschaftlichen Wandel, der aufgrund neuer Mobilitäts- und Kommunikationsmöglichkeiten nicht nur das Diversitätsbewusstsein schärft, sondern auch selbst aktiv dazu beiträgt, dass die Welt vielfältiger und heterogener wird. Auch wenn es sich in einzelnen Fällen nicht unbedingt um neue Formen der Diversität, sondern nur um neue Perspektiven handeln mag, aus denen Vielfalt neu entdeckt wird, bleibt doch unbestritten, dass Vielfalt Modernisierungs- und Urbanisierungsprozesse von Anfang an begleitet und geprägt hat. Es beginnt sich allmählich ein anderes Verständnis durchzusetzen, in dem die sich rasant entwickelnden Kommunikations- und Mobilitätsformen eine weltweite Vernetzung im Lokalen bewirken und zur Alltagsroutine werden (vgl. Bukow 2011: 40).

In diesem Kontext spricht Regina Römhild (2009: 234) von einem »neuen Kosmopolitismus von unten«, womit eine Art transversaler Bewegung gemeint ist, die Regionen, Kulturen, Lebensstile und Lebensformen, die oft geografisch wie zeitlich weit voneinander entfernt sind, in unterschiedlichen Kontexten auf lokaler Ebene zusammenbringt. Dabei entstehen, wie Martin Albrow (1997) sagt, diverse »Soziosphären«, die unterschiedlich gelagerte, weltweit gespannte gesellschaftliche wie lebensweltliche Phänomene und Verknüpfungen präsentieren. Diese neue globale Dynamik erfordert das Überdenken unserer Vorstellung von Raum und Zeit.

Die Gleichzeitigkeit von weltweiter Öffnung und lokaler Diversifizierungsprozesse lässt ethnisch-nationale Metaerzählungen fragwürdig werden und geht mit der Auflösung tradiertter Lebensformen einher. Lebensläufe, Differenzen und Zugehörigkeiten sind in Bewegung geraten, haben ihre Eindeutigkeit und räumliche Fixierung verloren, sind offener und damit auch riskanter geworden. Der Lebenslauf zerfällt immer mehr in einzelne Phasen und Abschnitte, reicht über herkömmliche Bezugspunkte wie Geburtsort oder erlernten Beruf hinaus. Die

durch radikale Öffnungsprozesse und radikale Individualisierung und Diversifizierung in Gang gesetzte *reflexive Wende*, die die Individuen immer weiter zum Nachdenken über ihre Lebensentwürfe nötigt, hat die gesamten Lebensbereiche und Lebensläufe zu einem Lernfeld werden lassen.

Zu Beginn des 21. Jahrhunderts gehört Bewegung praktisch zum Lebensentwurf. Zur Visualisierung dieser Mobilität hat Tamara O' Hara, eine in Japan geborene Künstlerin, eine interessante Kartografie entwickelt, die hier kurz vorgestellt wird, weil sie für die Idee der weltoffenen Stadt relevant ist: Sie nennt die von ihr entworfenen Zeichnungen »Bewegungsprotokolle« (protocols of movement). Verzeichnet werden diejenigen Wege, die eine Person während ihres bisherigen Lebens geografisch zurückgelegt hat. Zur Erstellung dieser Porträts legt sie dasselbe Blatt Papier nacheinander auf Welt-, Land- und Städtekarte und zeichnet die jeweils zurückgelegten Strecken nach. Das so entstandene Geflecht aus Linien lässt individuelle Weltkarten entstehen, inklusive der eigenen Grenzen. Sichtbar werden dabei Bewegungsspuren, die alle gleichwertig sind – unabhängig davon, ob es sich um Weltreise, Wohnortwechsel, Pendelwege, Flucht oder Auswanderung handelt. O' Haras »Porträts« verdeutlichen, inwieweit im 20. und 21. Jahrhundert räumliche Mobilität die Biografien bestimmt bzw. in Bewegung setzt.

## STÄDTE ALS ORTE DER MIGRATION UND DIVERSITÄT

Die in der Dokumentation der 217. Sonderausstellung des Historischen Museums der Stadt Wien im Jahr 1996 zur Geschichte und Gegenwart der Zuwanderung nach Wien zusammengestellten Beiträge belegen aus unterschiedlichen Perspektiven, welche Rolle Migrationsbewegungen für die Entwicklung, Urbanisierung und Diversifizierung von Wien gespielt haben. Es zeigt sich auch, dass große Entwicklungsschritte in der Stadtgeschichte immer einhergegangen sind mit dem Zuzug von Menschen, die neue Ideen, Sichtweisen, Impulse und vielfältige Kompetenzen mitbrachten. So notiert Peter Eppel einleitend:

»Gerade das typisch Wienerische hat viel mit der Randlage und Brückenfunktion dieser Stadt zu tun, mit den vielen Migrationsströmen, die ihre tiefen Spuren hinterlassen haben, ja unser Selbstverständnis bis heute prägen – auch wenn wir uns dessen oft nicht bewusst sind [...]. Im Alltagsleben der Wienerinnen und Wiener von heute kommt diese multiethnische Bevölkerungsentwicklung vor allem in der Sprache, Familiennamen, Straßennamen, Bräuchen und in der »Wiener Küche« zum lebendigen Ausdruck. In sehr vielen Fällen auch durch den Stammbaum der eigenen Familie.« (Wir 1996)

Auch Köln ist ein gutes Beispiel dafür, wie Migration vor allem nach dem Zweiten Weltkrieg die Städte geprägt und eine Vielfalt hervorgebracht hat, ohne die Köln heute kaum vorstellbar wäre. Auch in den einzelnen Stadtteilen haben Migrationsbewegungen ihre Spuren hinterlassen und wesentlich zur Kosmopolitisierung und Pluralisierung und damit auch zur Lebensqualität beigetragen. Aus historisch-ethnografischer Perspektive beschreibt Erwin Orywal (2007) die Kölner Migrationsgeschichte, die Sozialgefüge und Alltagskultur der Stadt ständig gewandelt und eine Diversität hervorgebracht hat, die durchaus als Ergebnis einer zweitausendjährigen Zuwanderung angesehen werden kann.

Köln bezeichnet sich gern als die nördlichste Stadt Italiens. Tatsächlich finden sich in Stadtbild, Geschäftsstrukturen und Straßenleben zahlreiche Hinweise auf den mediterranen Einfluss. Viele Beispiele zeigen, wie erfolgreich die Einwanderer trotz restriktiver Bedingungen und struktureller Barrieren waren. Allein angesichts der Tatsache, dass unter den Migranten die Arbeitslosigkeit doppelt so hoch und die allgemeine Qualifikation nur halb so hoch ist, stellen migrationsgeprägte Stadtteile oder Straßenzüge eine Erfolgsgeschichte dar. Sie zeigen, dass Einwanderer auch unter extrem ungünstigen Bedingungen einen hohen Integrationswillen besitzen und neue Kompetenzen entwickeln mussten. Obwohl politisch unerwünscht, ließen sich viele Gastarbeiterinnen und Gastarbeiter dauerhaft nieder und versuchten unter rechtlich erschwerten Bedingungen, sich in den Städten zu verorten, neue Räume zu schaffen und zu gestalten. In Köln bezogen sie in den 1970er Jahren als Gewerbetreibende leerstehende Ladenzeilen in Stadtvierteln, die im Zuge ökonomischer Umstrukturierung und Deindustrialisierung von einheimischen Unternehmern verlassen worden waren. Mit ihren quartiernahen Geschäften brachten sie wieder Leben auf die Straßen und trugen entscheidend zur Sanierung heruntergekommener urbaner Räume bei, die von Stadtplanern längst aufgegeben worden waren. In vielen Straßenzügen reihen sich nun gastronomische Betriebe, Dienstleister und Einzelhandelsgeschäfte mit Angeboten aus aller Welt aneinander. Als ein Paradebeispiel von vielen kann die Kölner Keupstraße gelten. Zugleich steht sie auch für die Ambivalenz, mit der migrationsgeprägte Stadtteile bis heute wahrgenommen werden. Lange haftete dieser Straße ein schlechter Ruf an (vgl. dazu ausführlich Bukow/Yildiz 2002; Jonuz/Schulze 2011). Entstanden als Arbeiterviertel nach dem Zweiten Weltkrieg, entvölkert durch Deindustrialisierung und wiederbelebt durch Zugewanderte, die aus der Not eine Tugend machten und zahlreiche Geschäfte eröffneten, die längst über die Stadtgrenzen hinaus eine breite Kundschaft anziehen, bietet sie heute ein attraktives Bild.

Migrationsgeprägte Stadtviertel weisen oftmals eine besser funktionierende Infrastruktur auf, ökonomische Nischen werden mit zahlreichen Unternehmen

besetzt und durch Eigeninitiative Aufstiegschancen geschaffen (vgl. Yildiz/Mattauch 2008). Da weder eine Niederlassung der Zugewanderten noch ihre ökonomische Einbindung in die Gesellschaft politisch vorgesehen waren, kann man ihre Unternehmensgründungen als ein Ankommen auf eigene Rechnung betrachten. Als ökonomische Selbstintegration, die unter schwierigen Bedingungen als Überlebensstrategie organisiert werden musste.

Durch Migration geprägte Quartiere oder Straßenzüge sind nicht als Abbild einer ›Herkunftskultur‹ zu verstehen, sondern als ein lokal-spezifisches Arrangement, das die Mobilität der Bewohnerschaft abbildet, ein Sinnbild für Urbanität. Ökonomische Strategien werden entfaltet, unterschiedliche kulturelle Elemente miteinander kombiniert, neue Traditionen erfunden. Die kleinen und mittelständischen Unternehmer orientieren sich am Geschmack ihrer Kundinnen und Kunden vor Ort. Die Läden und Lokale mit ihrer Angebotspalette und ihren Dekorationen bieten dem Besucher ein scheinbar orientalisches Bild. Sie sind ein Zugeständnis an die deutschen Vorstellungen von Orient oder Mittelmeerkultur, es sind Inszenierungen, in denen sich die unterschiedlichsten Elemente zu einer neuen, urbanen Tradition verbinden. Diese Mischung von Lokalität und Globalität macht die großstädtische Alltagswirklichkeit aus.

Sie spiegelt das wider, was vielfach als »transkulturelle Praxis« bezeichnet wird: sich mehrfach überlagernde und kreuzende soziale und kulturelle Erfahrungen. Grenzüberschreitende ökonomische, soziale und kulturelle Elemente und Netzwerke werden aktiviert und zu neuen Strukturen, Kommunikationsformen und Lebensentwürfen verbunden.

Die Beispiele zeigen anschaulich, dass Großstädte immer auch Weltstädte waren und somit kontinuierlich durch Diversität bzw. Heterogenität geprägt sind, eine Vielfalt, die erst durch die Entstehung von Nationalstaaten marginalisiert, ignoriert und verdeckt wurde. Gerade migrationsbedingte Mobilitätsbewegungen trugen wesentlich zur Pluralisierung und Diversifizierung urbaner Räume bei (vgl. Yildiz 2013). Um die historischen Sedimentbildungen der Städte freilegen zu können, brauchen wir einen anderen Blick auf urbane Wirklichkeiten, einen Perspektivwechsel, durch den wir mehr über Urbanisierungsprozesse und über städtische Lebenswirklichkeiten erfahren und andere Verortungspraxen und Lebensentwürfe ans Licht bringen können, die auf vielfältigen, sich überlagernden und differenten Wirklichkeitskonstruktionen basieren.

Das alles legt nahe, dass Sesshaftigkeit im urbanen Kontext über mehrere Generationen nicht die Regel ist. Jede dritte Lebensgeschichte in Großstädten wie Wien, Berlin oder Köln ist mittlerweile eine von Migration geprägte. Wenn wir heute von Großstadt sprechen, dann auch von ›Weltstadt‹, denn national-staatliche Grenzen verlieren für viele Menschen an Bedeutung. In der Gegenwart

erlangen Phänomene wie Sesshaftigkeit und Mobilität völlig neue Bedeutungen. Lokale Geschichten sind heutzutage immer eingebettet in weltweite Zusammenhänge. Infolge der geografischen Mobilität haben fast alle Menschen Verwandte oder Bekannte in verschiedenen Ländern, ihre Biografien weisen weltweite Bezüge auf, was mit Ulrich Beck als eine Art »banaler Kosmopolitismus« bezeichnet werden kann (Beck 2003: 33).

Durch die neuen Öffnungsprozesse werden alte Selbstverständlichkeiten und Kontinuitäten jedoch zunehmend infrage gestellt. Marginalisierte Gruppen, Diskurse und Perspektiven geraten ins Blickfeld. Soziale Phänomene, die bisher als einheitlich und eindeutig wahrgenommen wurden, waren schon immer hybrid und widersprüchlich (vgl. Tschernokoshewa 2005). Diese ehemals marginalen Perspektiven verweisen auf die Kontingenz und Brüchigkeit nationaler Wirklichkeitskonstruktionen und Weltauffassungen. Gerade Transtopien als Übersetzungsorte bzw. als Zwischenräume (vgl. Yildiz 2015; 2016)<sup>2</sup> sind charakteristisch für urbane Lebenskontexte, ermöglichen, wie Bachtin (1987: 85) in einem anderen Zusammenhang formuliert hat,

»Unterschiedliches zu kombinieren und Entferntes anzunähern, verhilft zur Loslösung vom herrschenden Weltbild, von Konventionen und Binsenwahrheiten, überhaupt von allem Alltäglichen, Gewohnten, als wahr Unterstelltem. Sie erlaubt einen anderen Blick auf die Welt, die Erkenntnis der Relativität alles Seienden und der Möglichkeit einer grundsätzlich anderen Ordnung.«

Urbane Transtopien ermöglichen die Öffnung des Blicks für diverse und widersprüchliche Lebensentwürfe, Lebensformen und simultane Zugehörigkeiten und damit einhergehende urbane Kompetenzen. Bei einer transtopischen Perspektive handelt es sich um einen Beobachtungsstandpunkt, der sich von binären Konstruktionen und nationalen Narrativen abwendet und die Relationalität verwobener Lebenswirklichkeiten in den Mittelpunkt stellt, womit diversitätsbewusste Einblicke in den Alltag möglich werden. So können die Wirkungen diverser Alltagspraxen von Menschen, die an komplexen Prozessen der Übertragung, Aneignung und Verwandlung beteiligt sind, sowie das in der Lebenspraxis hervortretende »Neue« ins Blickfeld der Betrachtung rücken.

---

2 Michel Foucault (1978) meinte mit *Heterotopien* realisierte Utopien im eher negativen Sinn, eine Art *Auslagerungsräume* für das Andere. *Transtopien* verweisen dagegen auf das positive Potenzial *realisierbarer Utopien* in einer durch Mobilität und Diversität geprägten globalisierten Welt.

Die Öffnung des Lokalen zur Welt lässt traditionelle kulturelle Zugehörigkeiten fraglich erscheinen, ermöglicht potenziell hybride Kombinationen in allen Teilen der Welt und lässt neue Differenzen und marginalisierte Wissensarten zu Tage treten. Neue Traditionen werden erfunden. In den einzelnen Lebensentwürfen werden verschiedene Verkettungen kultureller Erzählungen sichtbar, die in dieser Form ohne die weltweiten Öffnungsprozesse nicht denkbar wären. Biografien werden zunehmend auf weltgesellschaftlicher Basis entworfen. Kulturelle Elemente und Lebenswirklichkeiten gleichen unter globalen Bedingungen den »Konstellationen eines Kaleidoskops: Mit jeder Drehung ergibt sich eine Neuordnung der Teile, und wir sind erstaunt über die Andersartigkeit und Lebendigkeit jeder neuen Zusammenstellung.« (Benhabib 1999: 68)

Die weltweite Öffnung bedeutet also nicht eine Homogenisierung der Welt, die eine einheitliche »globale Kultur« entstehen ließe, sondern vielmehr eine neue Perspektive, eine Perspektivenverschiebung, eine Neuinterpretation, Sichtbarmachung und Neuerfindung von lokalen Lebenszusammenhängen. Auf diese Weise entsteht ein anderes Welt- und Diversitätsverständnis. Ähnlich argumentieren Ulrich Beck, Wolfgang Bonß und Christoph Lau (2001: 16):

»Die Debatte um einen neuen Kosmopolitismus verweist vielmehr auf komplexe Erfahrungsräume und Erwartungshorizonte, in denen die verschiedenen Ordnungen und Ordnungsvorstellungen des menschlichen Zusammenlebens widerspruchsvoll aufeinander treffen und zur Artikulation gedrängt werden. Es ist also die Differenz und nicht die Einheit, welche den neuen »transnationalen« Erfahrungsraum kennzeichnet.«

Das Globale liefert den Kontext, innerhalb dessen urbane Lebenswirklichkeiten vor Ort entfaltet und organisiert werden. Bei der Lebensgestaltung werden bisherige Routinen neu interpretiert, überdacht und transformiert. Unterschiedliche grenzüberschreitende Perspektiven und Differenzen werden von Menschen unter lokalen Bedingungen miteinander in Beziehung gesetzt und biografisch bearbeitet. In dieser Hinsicht stellen gegenwärtige Lebensentwürfe Transtopien dar, weil erst in den biografischen Erzählungen unterschiedliche Orte, Menschen, Erfahrungen und Ereignisse miteinander verbunden werden. So gewinnen Biografien durch jeweilige Strategien und Verknüpfungen ihre spezifischen Ausprägungen. Was die Folgen der Globalisierung vor Ort betrifft, schreibt Martin Albrow (1997: 311):

»Eine der Folgen der Globalisierung für den Ort ist, dass Menschen an einem Ort wohnen und ihre wichtigsten Beziehungen sich fast ganz nach außen und über die ganze Welt erstrecken. Dies bedeutet, dass Menschen den Ort als Sitz und Ressource sozialer Aktivität

ten in sehr unterschiedlicher Form entsprechend der Ausdehnung ihrer Soziosphäre nutzen.«

Globalität, Migration und Diversität werden zur alltäglichen urbanen Erfahrung. Auf diese Weise verstärkt sich die Vielfalt kultureller Impulse in verschiedenen Bereichen, sei es in der bildenden Kunst, im Film, in der Musik, Literatur oder Alltagskultur. Neue Stilmischungen werden hervorgebracht. Interessant erscheint in dieser Entwicklung, dass die globalisierten Gesellschaften in der Lage sind, die unterschiedlichsten und zum Teil widersprüchlichsten kulturellen Impulse zu absorbieren. Durch weltweite Öffnungsprozesse, die potenziell neue Möglichkeiten für Lebensentwürfe eröffnen, wird das Alltagsleben immer reflexiver und die reflexiv gestalteten Lebenswelten werden zu einem zentralen Moment der Strukturierung von Biografien (vgl. Giddens 1991). Weltweite Öffnungsprozesse verstärken einerseits die Enttraditionalisierungstendenzen im Alltag und tragen andererseits zur Erfindung neuer Traditionen bei, wobei unterschiedliche Elemente aus allen Teilen der Welt in den lokalen Kontext einfließen. Gerade am Beispiel von Migrationsprozessen, einer wichtigen Triebkraft weltweiter Öffnung, lässt sich zeigen, wie migrantische und postmigrantische Gruppen unter lokalen Bedingungen neue Traditionen von Literatur, Musik, Film oder Sprachgebrauch prägen und neue Inkorporationsstrategien entwickeln – ob im medialen Bereich, der Hip-Hop-Kultur oder anderen Trends, die zum Teil von der postmigrantischen Generation begründet werden (vgl. Yildiz 2015; 2016).

## **NEUE VERORTUNGSPRAXEN UND KOMPETENZEN IM MIGRATIONSKONTEXT**

Wenn man das übliche »ethnologische Rezeptwissen« (Terkessidis 2010: 134) dekonstruiert, sich von einer »normalistischen« Sichtweise auf urbane Wirklichkeiten und Lebensentwürfe verabschiedet und stattdessen die konkreten Alltagspraxen von Individuen ins Blickfeld rückt, dann erscheint vieles in einem neuen Licht. Der andere Blick ermöglicht neue und diversitätsbewusste Einsichten in die Lebenswirklichkeiten von Menschen; wir begegnen einer *gelebten alltagspraktischen Diversität*.

In globalisierten Städten gleichen die Lebenswirklichkeiten dem, was Edward Said (1990) »atonales Ensemble« nennt: Die alltägliche Realität ist gekennzeichnet durch radikale Vielfalt, Mehrdeutigkeit und Widersprüche. Urbane Kontexte, in denen sich die Einzelnen bewegen, handeln und leben, eröffnen in



ihren Kombinationsmöglichkeiten überhaupt erst so etwas wie die Einzigartigkeit des Individuums. So bildet sich ein »Beobachtungshorizont« (Beck 1997), der neue Lebensweisen und Verortungsstrategien ermöglicht, die über das Lokale, Regionale und Nationale hinausgehen und den Alltag vor Ort mit der Welt verbinden. Gerade migrantische oder postmigrantische Lebensentwürfe sind Paradebeispiele dafür, wie solche transnationalen Netzwerke und Strategien entwickelt werden, wie Mehrfachzugehörigkeiten zustande kommen und welche Rolle sie für die Betroffenen im konkreten Alltag spielen (können).

Es ist wichtig, sich nicht nur auf die vielfältige Herkunft der Menschen, sondern auf die Vielfalt der geistigen und kulturellen Horizonte zu beziehen, die in lokalen Kontexten entstehen. Gerade hier zeigen sich die kreativen Potenziale von biografischen Entwürfen, die durch Migrationsbewegungen entstanden sind und im (urbanen) Alltag heute eine gelebte Normalität darstellen. Durch transnationale Netzwerke und deren Nutzung werden neue Kompetenzen entwickelt, soziales und kulturelles Kapital akkumuliert (vgl. Bourdieu 1992). Transnationale Räume werden zu Möglichkeitsräumen (vgl. Schiffauer 2006: 169 ff.). So werden »bewegte Zugehörigkeiten« (Strasser 2009) und weltweit gespannte Mehrfachverbindungen zu einem komplexen, vielschichtigen und hybriden Phänomen und somit zu einer biografischen Ressource in einer globalisierten Welt. Lebensentwürfe erscheinen als ein Ergebnis von unterschiedlichen Beziehungen, Verbindungen und Verknüpfungen, die sogar die ganze Welt umspannen können, eine Art transkultureller Hybridisierung. Aus diesen Netzwerken und Lebensentwürfen entstehen neue Formen und kreative Erfindungen, die die Betreffenden aus unterschiedlichen Elementen auf lokaler Ebene reflexiv zusammenfügen. Solche Entwicklungen verweisen auf eine Lebenspraxis, die der Wirklichkeit der globalisierten Welt nicht hinterherhinkt, sondern sie vorantreibt (vgl. Apitzsch 1999: 482).

Das Leben zwischen oder in unterschiedlichen Welten, das bisher vor allem im Migrationskontext als »Zerrissenheit« oder »Leidensprozess« dramatisiert wurde, erfährt jetzt eine konstruktive biografische Relevanz für die Betroffenen und wird möglicherweise zu einer passenden Metapher für die kosmopolitischen Zeichen der Zeit. In diesem Sinne stellt Regina Römhild (2003: 14) zutreffend fest: »Es ist die Illusion der Sesshaften, dass man sich räumlich und kulturell auf ein Territorium festlegen muss, um eine Antwort auf die Frage der Identität zu finden.«

Zusammenfassend kann zunächst festgehalten werden: Das Alltagsleben folgt eher einer undramatischen sozialen Grammatik, die stärker an konkreten Prozessen und Erfahrungskontexten orientiert ist, als es die allzu einfachen kulturellen Zuschreibungen suggerieren. Gerade die im öffentlichen Diskurs skan-

dalisierten migrantischen oder postmigrantischen Grenzbiografien, die weder zum einen noch zum anderen »Kulturkreis« gehören, sondern sich dauerhaft in Zwischen-Räumen befinden, werden in Zukunft die Weltgesellschaft prägen. Urbane Räume bzw. Transtopien werden zu Bühnen, Ausgangspunkten und Schnittstellen für viele Verortungsstrategien. Hier wird eine soziale Grammatik sichtbar, die neue Möglichkeitsräume erlaubt, in denen Differenzen neu gedacht, aktiviert und auf unterschiedliche Weise miteinander kombiniert werden. Diese Formen der Neugestaltung geschehen nicht in mythischen Integrationskonzepten, sondern vor allem in den Niederungen des Alltäglichen: »Eine Politik zur Gestaltung der Vielheit«, so Mark Terkessidis (2010: 88): »muss diese alltäglichen Erlebnisse ernst nehmen.« »Es geht darum, den geteilten Raum kreativ neu zu erfinden. Insofern darf ›Diversity‹ auch nicht als notwendiges Übel betrachtet werden, sondern als eine begrüßenswerte Gestaltungsaufgabe.« (Terkessidis 2011: 203 f.).

Durch wachsende lokale wie globale Mobilität sowie durch die Pluralisierung und Diversifizierung der Lebenswelten werden öffentliche Institutionen zunehmend mit der Notwendigkeit einer transkulturellen und diversitätsbewussten Öffnung konfrontiert. Ob ein solcher Öffnungsprozess bewusst im Rahmen einer Organisationsentwicklung gefördert oder eher reaktiv und unkoordiniert vollzogen wird, hängt letztlich von der Voraussicht der jeweiligen Institution ab.

»Vielfalt als Chance«, so lautete 2008 das Motto einer vom deutschen Bundesministerium und der Europäischen Union lancierten Werbekampagne zur Förderung von Diversität in Gesellschaft und öffentlichen Institutionen. Dies zeigt die Relevanz und Notwendigkeit der bewussten Wahrnehmung und Auseinandersetzung mit Diversität in der Gesellschaft.

Diversität, die im Zuge globaler Öffnungsprozesse quantitativ wie qualitativ kontinuierlich zunimmt und den Alltag von Menschen und die institutionelle Normalität prägt, verlangt einen konstruktiven, zukunftsweisenden und ressourcenorientierten Umgang. Wir brauchen in der globalisierten Welt ein neues »Diversitätsverständnis«. Diversity darf nicht als ein Programm verstanden werden, das lediglich darauf abzielt, eine bessere und zeitgemäße Stimmung zu erzeugen, sondern ein Konzept zur personellen, kulturellen und inhaltlichen Öffnung von Institutionen in Bezug auf Vielfalt der Menschen und deren Kompetenzen – eine transkulturelle und diversitätsbewusste Öffnung, die etabliert und weiterentwickelt sowie anhand konkreter Zielvorgaben überprüft werden kann. Nach diesem Verständnis bedeutet Diversität, dass im alltäglichen Umfeld vielfältige Differenzen und Erfahrungen möglich und normal sind und der Umgang mit Komplexität, globaler Diversität als eine der heutigen Schlüsselkompetenzen alltäglich geübt wird.

## MIGRATION – GLOBALISIERUNG – DIVERSITÄT ALS URBANE ALLTAGSPRAXIS

In einer globalisierten und durch radikale Vielfalt geprägten Welt heißt Migration nicht einfach, von einem Ort aufzubrechen, in den nächsten einzuwandern, um dort integriert zu werden. Vielmehr entstehen durch Migrationsbewegungen neue Räume, neue Lebensentwürfe und transnationale Orientierungen, durch Grenzüberschreitungen und transnationale Verbindungen werden weltweite Phänomene in den urbanen Alltag übersetzt, die für das Zusammenleben vor Ort und für die Alltagspraxis von Bedeutung sind.

Urbaner Wandel durch Migration bedeutet daher, sich vom »methodologischen Nationalismus« (Glick Schiller 2014: 158 ff.) zu distanzieren, das hegemonale Diktat der Sesshaftigkeit infrage zu stellen, an urbanen Welten anzusetzen und die (Post)Migranten als Experten ihrer eigenen Lebenspraxis zu betrachten.

»Die Bewegung ist eben nicht etwa eine Abweichung von der Sesshaftigkeit, sondern Normalzustand und gleichzeitig notwendige Voraussetzung von Subjektivität.« (Ebd.: 96)

Zum Schluss bleibt zu sagen: Wir leben längst in einer Welt, die überall und dauerhaft von den Erfahrungen und Wirkungen des Kommens, Gehens und Bleibens geprägt ist. Eine Art »Supervielfalt« (Steven Vertovec) scheint jedenfalls charakteristisch für unsere Zeit.

## LITERATUR

- Albrow, Martin (1997): »Auf Reisen jenseits der Heimat. Soziale Landschaften in einer globalen Stadt«, in: Ulrich Beck (Hg.), *Kinder der Freiheit*. (= Edition Zweite Moderne), Frankfurt am Main: Suhrkamp, S. 288-314.
- Apitzsch, Ursula (1999): »Biographieforschung und interkulturelle Pädagogik«, in: Heinz-Hermann Krüger/Winfried Marotzki (Hg.), *Handbuch erziehungswissenschaftliche Forschung*, Opladen: Leske & Budrich, S. 471-486.
- Bachtin, Michail M. (1987): *Rabelais und seine Welt: Volkskultur als Gegenkultur*, Frankfurt am Main: Suhrkamp.
- Beck, Ulrich (1997): »Was meint »eigenes Leben«?«, in: Ulrich Beck/Ulf Erdmann/Timm Rautert (Hg.), *Eigenes Leben. Ausflüge in die unbekannte Gesellschaft, in der wir leben*, München: C.H. Beck, S. 9-30.

- Beck, Ulrich (2003): »Verwurzelter Kosmopolitismus: Entwicklung eines Konzeptes aus rivalisierenden Begriffsoptionen«, in: Ulrich Beck et al. (Hg.), *Globales Amerika? Die kulturellen Folgen der Globalisierung*, Bielefeld: transcript Verlag, S. 25-43.
- Beck, Ulrich/Bonß, Wolfgang/Lau, Christoph (2001): »Theorie reflexiver Modernisierung – Fragestellungen, Hypothesen, Forschungsprogramme«, in: Ulrich Beck/Wolfgang Bonß (Hg.), *Die Modernisierung der Moderne*, Frankfurt am Main: Suhrkamp, S. 11-59.
- Benhabib, Seyla (1999): *Kulturelle Vielfalt und demokratische Gleichheit. Politische Partizipation im Zeitalter der Globalisierung*. Frankfurt am Main: Suhrkamp.
- Bourdieu, Pierre (1992): »Ökonomisches Kapital – Kulturelles Kapital – Soziales Kapital«, in: ders., *Die verborgenen Mechanismen der Macht*, Hamburg: VSA, S. 49-80.
- Bukow, Wolf-Dietrich (2010): *Urbanes Zusammenleben. Zum Umgang mit Migration und Mobilität in europäischen Stadtgesellschaften*. Wiesbaden: VS Verlag.
- Bukow, Wolf-Dietrich (2011): »Zur alltäglichen Vielfalt von Vielfalt – postmoderne Arrangement und Inszenierungen«, in: Christina Allemann-Ghionda/Wolf-Dietrich Bukow (Hg.), *Orte der Diversität*, Wiesbaden: VS Verlag, S. 35-54.
- Bukow, Wolf-Dietrich/Yildiz, Erol (2002): »Der Wandel von Quartieren in der metropolitanen Gesellschaft am Beispiel Keupstraße in Köln oder: Eine bekannte Entwicklung?«, in: Wolf-Dietrich Bukow/Erol Yildiz (Hg.), *Der Umgang mit der Stadtgesellschaft. Ist die multikulturelle Stadt gescheitert oder wird sie zu einem Erfolgsmodell?*, Opladen: Leske & Budrich, S. 81-111.
- Foucault, Michel (1978): »Historisches Wissen der Kämpfe und Macht«, in: Michel Foucault, *Dispositive der Macht. Über Sexualität, Wissen und Wahrheit*. Berlin: Merve Verlag.
- Giddens, Anthony (1991): *Modernity and Self-Identity – Self and Society in Late Modern Age*. Stanford University Press, Stanford.
- Glick Schiller, Nina (2014): »Das transnationale Migrationsparadigma: Globale Perspektiven auf die Migrationsforschung«, in: Boris Nieswand/Heike Drotbohn (Hg.), *Kultur, Gesellschaft, Migration. Die reflexive Wende der Migrationsforschung*, Wiesbaden: Springer VS, S. 153-178.
- Jonuz, Elizabeta/Schulze, Erika (2011): »Vielfalt als Motor städtischer Entwicklung. Das Beispiel der Keupstraße in Köln«, in: Wolf-Dietrich Bukow/Gerda Heck/Erika Schulze/Erol Yildiz (Hg.), *Neue Vielfalt in der urbanen Stadtgesellschaft*, Wiesbaden: Springer VS, S. 33-48.

- Orywal, Erwin (2007): Kölner Stammbaum. Zeitreise durch 2000 Jahre Migrationsgeschichte. Köln: Kiepenheuer und Witsch.
- Römhild, Regina (2003): »Welt Raum Frankfurt«, in: Sven Bergmann/Regina Römhild (Hg.), Global Heimat. Ethnographische Recherchen im transnationalen Frankfurt, Frankfurt am Main: Universität Frankfurt, Institut für Kulturanthropologie, S. 7-20.
- Römhild, Regina (2009): »Aus der Perspektive der Migration. Die Kosmopolitisierung Europas«, in: Sabine Hess et al. (Hg.), No Integration?! Kulturwissenschaftliche Beiträge zur Integrationsdebatte in Europa, Bielefeld: transcript Verlag, S. 225-239.
- Said, Edward (1990): »Figures, Configurations, Transfigurations«, in: Race & Class Nr. 1, S. 16-22.
- Said, Edward (1994): Kultur und Imperialismus. Einbildungskraft und Politik im Zeitalter der Macht. Frankfurt am Main: Fischer Verlag.
- Schiffauer, Werner (2006): »Transnationale Solidaritätsgruppen, Imaginäre Räume, Irreale Konditionalsätze«, in: Helmuth Berking (Hg.), Die Macht des Lokalen in einer Welt ohne Grenzen, Frankfurt am Main/New York: Campus Verlag, S. 164-180.
- Strasser, Sabine (2009): Bewegte Zugehörigkeiten. Nationale Spannungen, transnationale Praktiken und transversale Politik. Wien: Turia + Kant.
- Terkessidis, Mark (2010): Interkultur. Berlin: Suhrkamp.
- Terkessidis, Mark (2011): »Integration ist von gestern, »Diversity« für morgen – ein Vorschlag für eine gemeinsame Zukunft«, in: Wolf-Dietrich Bukow et al. (Hg.) Neue Vielfalt in der urbanen Stadtgesellschaft, Wiesbaden: Springer VS, S. 189-206.
- Terkessidis, Mark (2015): Kollaboration. Berlin: Suhrkamp.
- Tschernokoshewa, Elka (2005): »Geschichten von hybriden Leben: Begriffe und Erahrungswege«, in: Elka Tschernokoshewa/Marija Jurić Pahor (Hg.), Auf der Suche nach hybriden Lebensgeschichten. Theorie – Feldforschung – Praxis, Münster/New York u.a.: Waxmann Verlag, S. 9-42.
- WIR (1996): Zur Geschichte und Gegenwart der Zuwanderung nach Wien. 217. Sonderausstellung des Historischen Museums der Stadt Wien, 19. September bis 29. Dezember 1996, Eigenverlag der Museen der Stadt Wien, mit einer Einleitung von Peter Eppel.
- Yildiz, Erol (2013): Die weltoffene Stadt. Wie Migration Globalisierung zum urbanen Alltag macht. Bielefeld: transcript Verlag.
- Yildiz, Erol (2015): »Postmigrantische Perspektiven. Aufbruch in eine neue Geschichtlichkeit«, in: Erol Yıldiz/Marc Hill (Hg.), Nach der Migration. Post-

migrantische Perspektiven jenseits der Parallelgesellschaft, Bielefeld: transcript Verlag, S. 19-36.

Yildiz, Erol (2016): »Dazwischen als soziale Praxis. Postmigrantische Lebensentwürfe«, in: Stefanie Bürkle (Hg.), Migration von Räumen. Architektur und Identität im Kontext türkischer Remigration, Berlin: Vice Versa Verlag, S. 140-161.

Yildiz, Erol (2016): »Postmigrantische Perspektiven auf Migration, Stadt und Urbanität«, in: Thomas Geisen/Christine Riegel/Erol Yildiz (Hg.), Migration, Stadt und Urbanität. Perspektiven auf die Heterogenität migrantischer Lebenswelten, Wiesbaden: Springer VS, S. 19-34.

Yildiz, Erol/Mattauch, Birgit (Hg.) (2008): Urban Recycling. Migration als Großstadt-Ressource (= Bauwelt Fundamente, Band 140), Basel/Boston/Berlin: Birkhäuser Verlag
